# Supplementary material
Source: MDPI journal article supplement (https://www.mdpi.com/2073-4441/13/11/1565)
Supplement: s1 [file s1]

## Supplementary material: Figures S1, S2 and S3

### The value of water – estimating water-disruption impacts on businesses

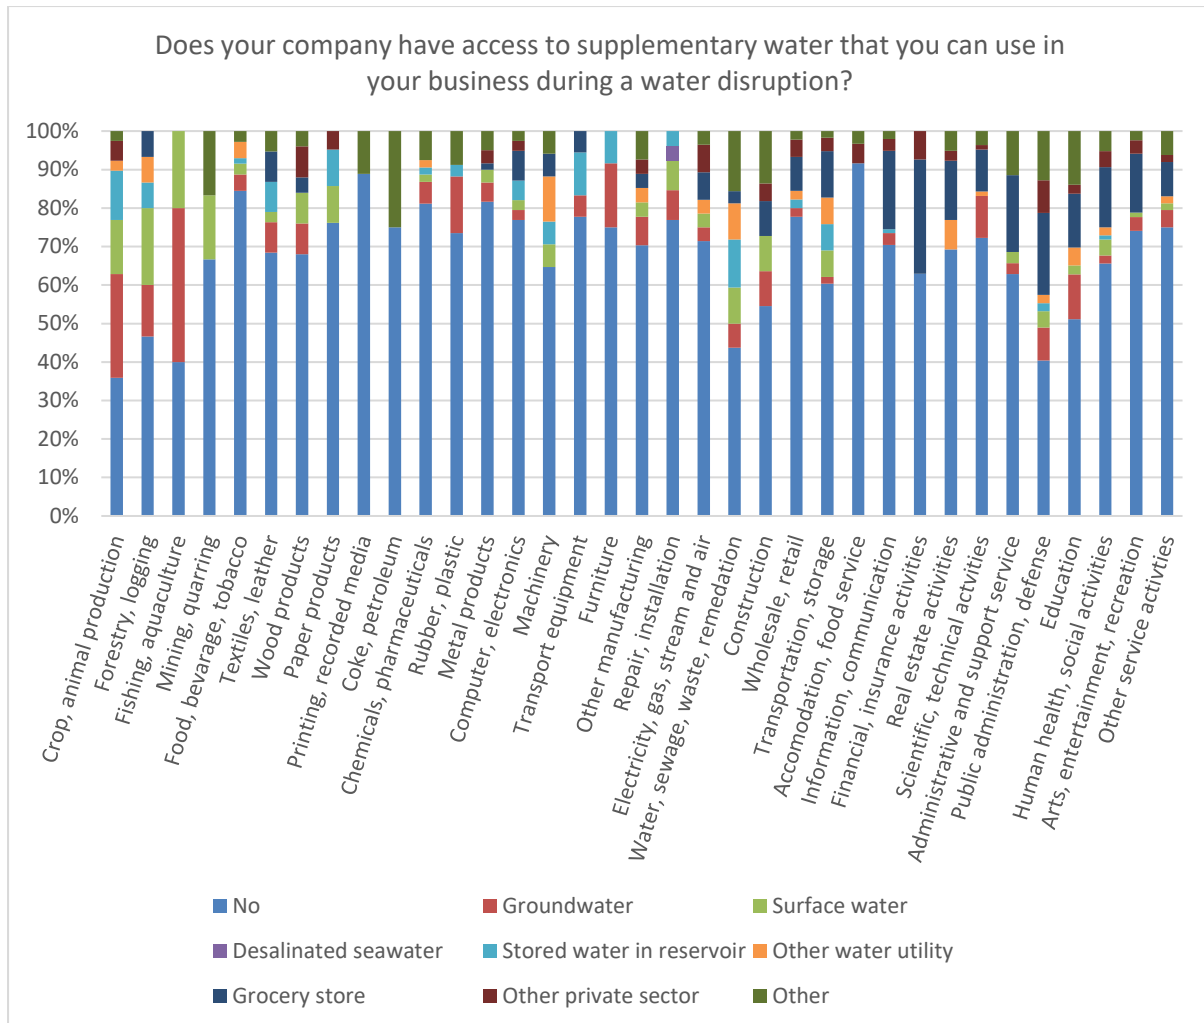

**Figure S1.** Survey results regarding whether the companies in each sector have access to supplementary water, and if so which kind.

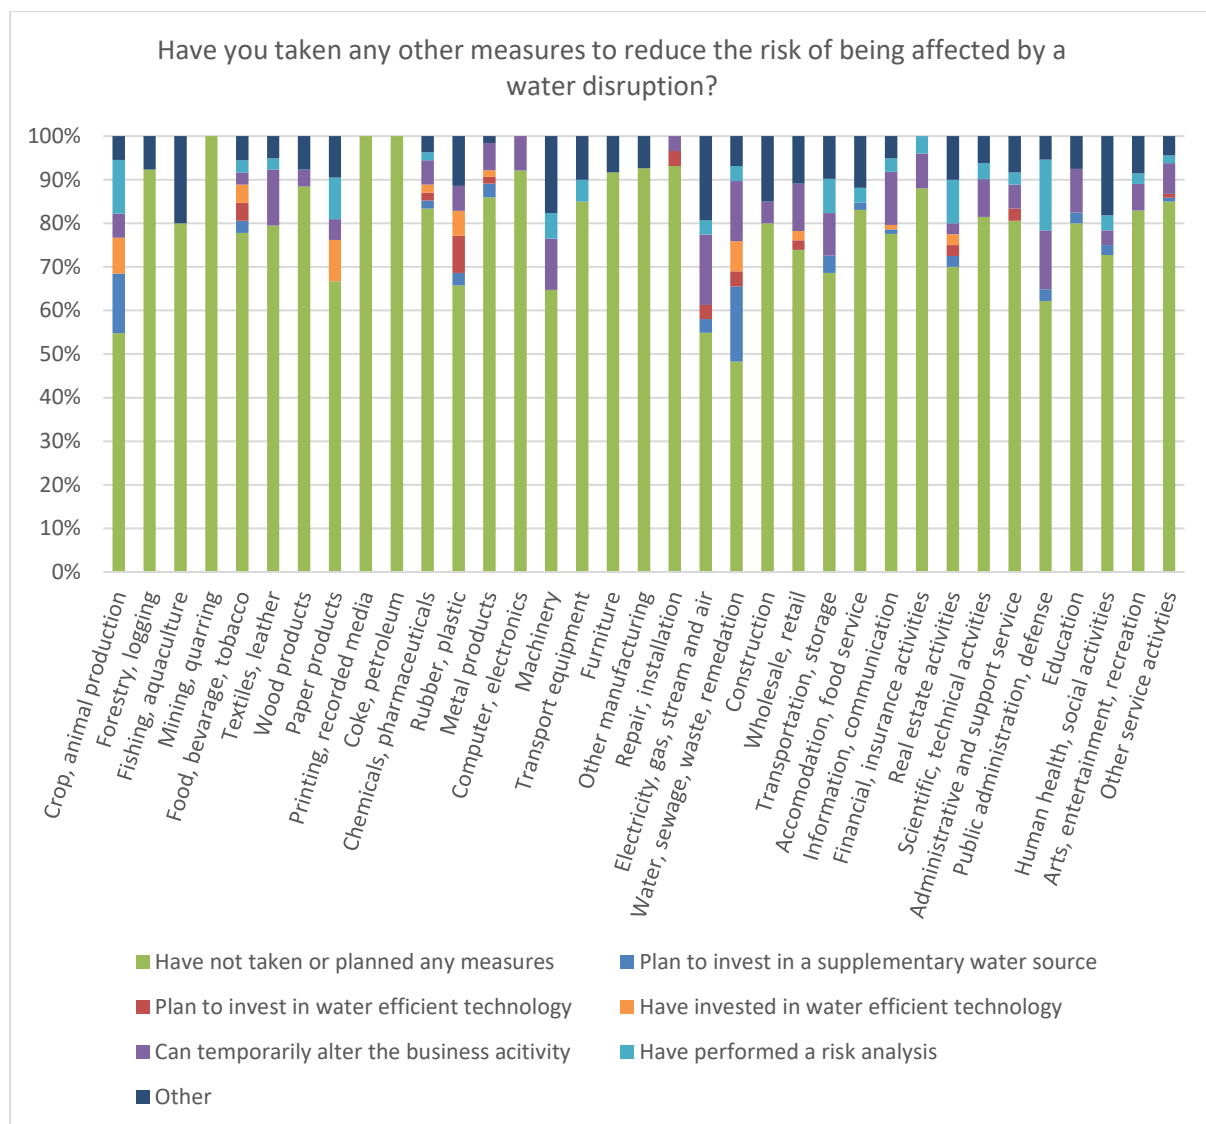

**Figure S2.** Survey results regarding whether the companies in each sector have taken, or plan to take, any measures to reduce the risk of being affected by a water disruption.

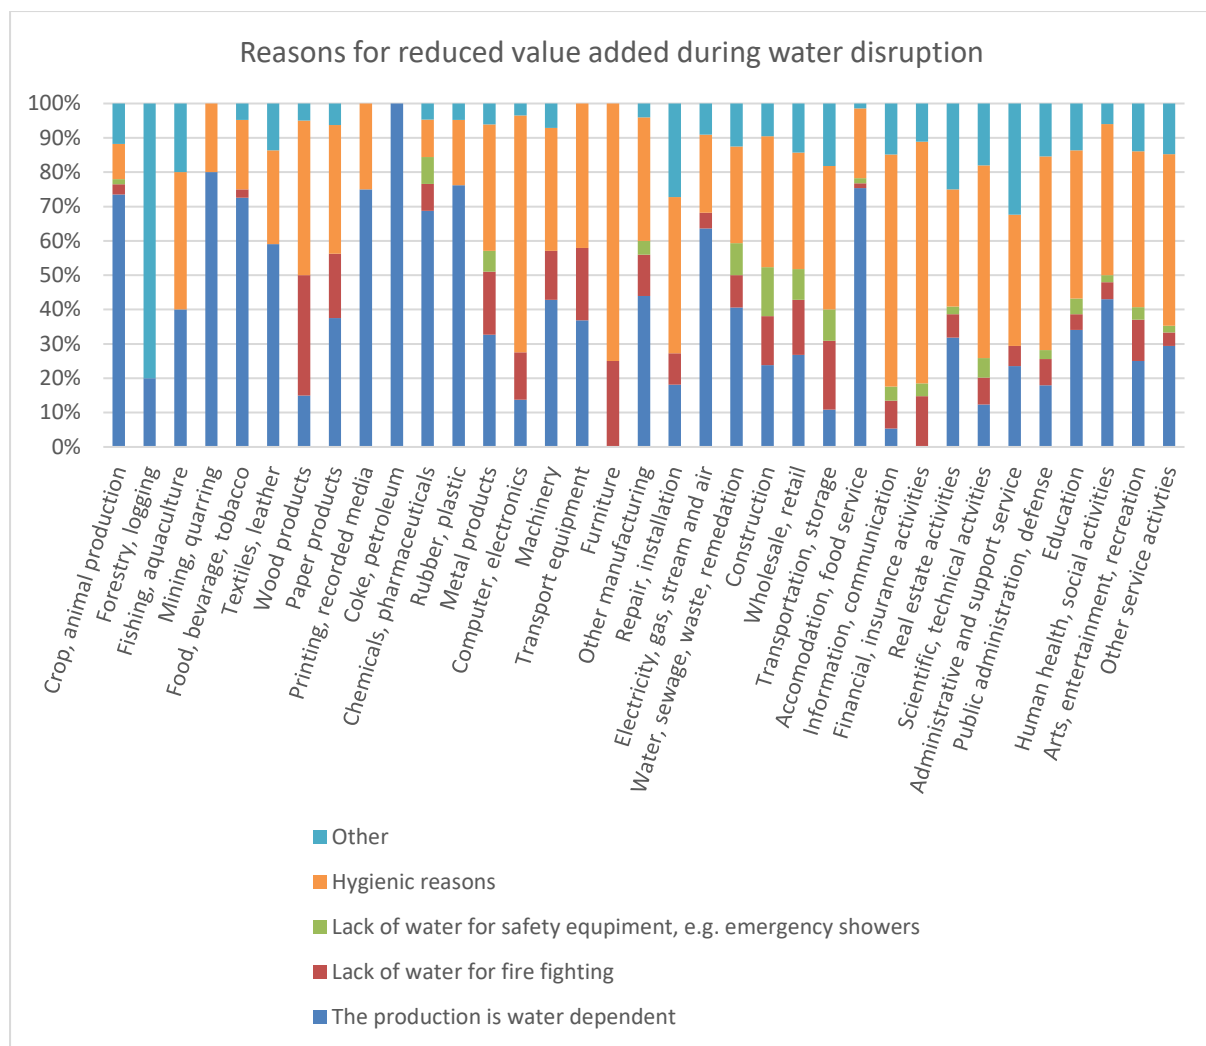

**Figure S3.** Reasons for reduced value added during water disruptions.
