# Supplementary material
Source: MDPI journal article supplement (https://www.mdpi.com/2073-4441/13/11/1565)
Supplement: s1 [file s1]

## Supplementary material: Survey questionnaire S1

### The value of water – estimating water-disruption impacts on businesses

#### 1. Which Swedish county is your company mainly active in?

- ☐ Stockholms län
- ☐ Uppsala län
- ☐ Södermanlands län
- ☐ Östergötlands län
- ☐ Jönköpings län
- ☐ Kronobergs län
- ☐ Kalmar län
- ☐ Gotlands län
- ☐ Blekinge län
- ☐ Skåne län
- ☐ Hallands län
- ☐ Västra Götalands län
- ☐ Värmlands län
- ☐ Örebro län
- ☐ Västmanlands län
- ☐ Dalarnas län
- ☐ Gävleborgs län
- ☐ Västernorrlands län
- ☐ Jämtlands län
- ☐ Västerbottens län
- ☐ Norrbottens län

#### 2. How many employees does your company have?

- ☐ 0–9 employees
- ☐ 10–49 employees
- ☐ 50–199 employees
- ☐ ≥200 employees

#### 3. Which economic activity sector (section and division) does your company belong to?

| NACE Code | Economic activity (section)       | NACE code | Economic activity (division)  |
|-----------|-----------------------------------|-----------|-------------------------------|
| A         | Agriculture, forestry and fishing | A 01      | Crop and animal production    |
|           |                                   | A 02      | Forestry and logging          |
|           |                                   | A 03      | Fishing and aquaculture       |
| B         | Mining and quarrying              | B 07–09   | Mining and quarrying          |
| C         | Manufacturing                     | C 10–12   | Food, beverage and tobacco    |
|           |                                   | C 13–15   | Textiles and leather          |
|           |                                   | C 16      | Wood products                 |
|           |                                   | C 17      | Paper products                |
|           |                                   | C 18      | Printing and recorded media   |
|           |                                   | C 19      | Coke and petroleum            |
|           |                                   | C 20–21   | Chemicals and pharmaceuticals |
|           |                                   | C 22–23   | Rubber and plastic            |
|           |                                   | C 24–25   | Metal products                |
|           |                                   | C 26–27   | Computer and electronics      |

|   |                                                   |         |                                                                            |
|---|---------------------------------------------------|---------|----------------------------------------------------------------------------|
|   |                                                   | C 28    | Machinery                                                                  |
|   |                                                   | C 29–30 | Transport equipment                                                        |
|   |                                                   | C 31    | Furniture                                                                  |
|   |                                                   | C 32    | Other manufacturing                                                        |
|   |                                                   | C 33    | Repair and installation                                                    |
| D | Electricity, gas, steam and air                   | D 35    | Electricity, gas, steam and air                                            |
| E | Water, sewerage, waste and remediation            | E 36    | Water collection, treatment and supply                                     |
|   |                                                   | E 37    | Sewerage                                                                   |
|   |                                                   | E 38    | Waste collection, treatment and disposal activities; materials recovery    |
|   |                                                   | E 39    | Remediation activities                                                     |
| F | Construction                                      | F 41    | Construction of buildings                                                  |
|   |                                                   | F 42    | Civil engineering                                                          |
|   |                                                   | F 43    | Specialised construction activities                                        |
| G | Wholesale and retail; repair of motor vehicles    | G 45    | Wholesale and retail trade and repair of motor vehicles                    |
|   |                                                   | G 46    | Wholesale trade, except of motor vehicles                                  |
|   |                                                   | G 47    | Retail trade, except of motor vehicles                                     |
| H | Transportation and storage                        | H 49    | Land transport and transport via pipelines                                 |
|   |                                                   | H 50    | Water transport                                                            |
|   |                                                   | H 51    | Air transport                                                              |
|   |                                                   | H 52    | Warehousing and support activities for transportation                      |
|   |                                                   | H 53    | Postal and courier activities                                              |
| I | Accommodation and food service                    | I 55    | Accommodation                                                              |
|   |                                                   | I 56    | Food and beverage service activities                                       |
| J | Information and communication                     | J 58    | Publishing activities                                                      |
|   |                                                   | J 59    | Motion picture, video and television, sound recording and music publishing |
|   |                                                   | J 60    | Programming and broadcasting activities                                    |
|   |                                                   | J 61    | Telecommunications                                                         |
|   |                                                   | J 62    | Computer programming, consultancy                                          |
|   |                                                   | J 63    | Information service activities                                             |
| K | Financial and insurance activities                | K 64    | Financial service activities, except insurance and pension funding         |
|   |                                                   | K 65    | Insurance, reinsurance and pension funding                                 |
|   |                                                   | K 66    | Activities auxiliary to financial services and insurance activities        |
| L | Real estate activities                            | L 68    | Real estate activities                                                     |
| M | Professional, scientific and technical activities | M 69    | Legal and accounting activities                                            |
|   |                                                   | M 70    | Activities of head offices; management consultancy                         |
|   |                                                   | M 71    | Architectural and engineering; technical testing and analysis              |
|   |                                                   | M 72    | Scientific research and development                                        |
|   |                                                   | M 73    | Advertising and market research                                            |
|   |                                                   | M 74    | Other professional, scientific and technical activities                    |
|   |                                                   | M 75    | Veterinary activities                                                      |
|   |                                                   |         |                                                                            |
| N | Administrative and support service activities     | N 77    | Rental and leasing activities                                              |
|   |                                                   | N 78    | Employment activities                                                      |
|   |                                                   | N 79    | Travel agency, tour operator and other reservation service                 |
|   |                                                   | N 80    | Security and investigation activities                                      |
|   |                                                   | N 81    | Services to buildings and landscape activities                             |
|   |                                                   | N 82    | Office administrative, office support                                      |
| O | Public administration and defense                 | O 84    | Public administration and defense                                          |
| P | Education                                         | P 85    | Education                                                                  |
| Q | Human health and social work activities           | Q 86    | Human health activities                                                    |
|   |                                                   | Q 87    | Residential care activities                                                |
|   |                                                   | Q 88    | Social work activities without accommodation                               |

|   |                                    |      |                                                           |
|---|------------------------------------|------|-----------------------------------------------------------|
| R | Arts, entertainment and recreation | R 90 | Creative, arts and entertainment                          |
|   |                                    | R 91 | Libraries, archives, museums                              |
|   |                                    | R 92 | Gambling and betting activities                           |
|   |                                    | R 93 | Sports activities and amusement and recreation activities |
| S | Other service activities           | S 94 | Activities of membership organisations                    |
|   |                                    | S 95 | Repair of computers and personal and household goods      |
|   |                                    | S 96 | Other personal service activities                         |

#### 4. What type of main water source do you use in your company?

Do not consider any supplementary water sources in this question.

- ☐ Only municipal water
- ☐ Municipal and private water
- ☐ Only private water

#### 5. If private water, what is the water source?

Choose one or multiple alternatives.

- ☐ Groundwater
- ☐ Surface water
- ☐ Desalinated seawater
- ☐ Other: *Open ended*

#### 6. How much of your value added\* (%) do you estimate that you can maintain during a water disruption of the following duration?

Assume that the shorter disruptions occur at a time when the business is running. 100 % corresponds to value added at normal business activity, and 0 % corresponds to added value when the business is closed. If you have access to a supplementary water source, take that into account in your answer. See examples in the figure below for how the added value can change over time.

\*Value added = Value of the company's output minus the total cost of inputs.

For those of you who do not conduct your economic activity as a company (e.g. authorities), answer the question based on the percentage of normal activity.

|                                  | Two-hour disruption | Four-hour disruption | Twelve-hour disruption | One-day disruption | One-week disruption | One-month disruption |
|----------------------------------|---------------------|----------------------|------------------------|--------------------|---------------------|----------------------|
| 100 % (normal business activity) |                     |                      |                        |                    |                     |                      |
| 80-99 %                          |                     |                      |                        |                    |                     |                      |
| 60-79 %                          |                     |                      |                        |                    |                     |                      |
| 40-59 %                          |                     |                      |                        |                    |                     |                      |
| 20-39 %                          |                     |                      |                        |                    |                     |                      |
| 1-19 %                           |                     |                      |                        |                    |                     |                      |
| 0 % (closed business activity)   |                     |                      |                        |                    |                     |                      |

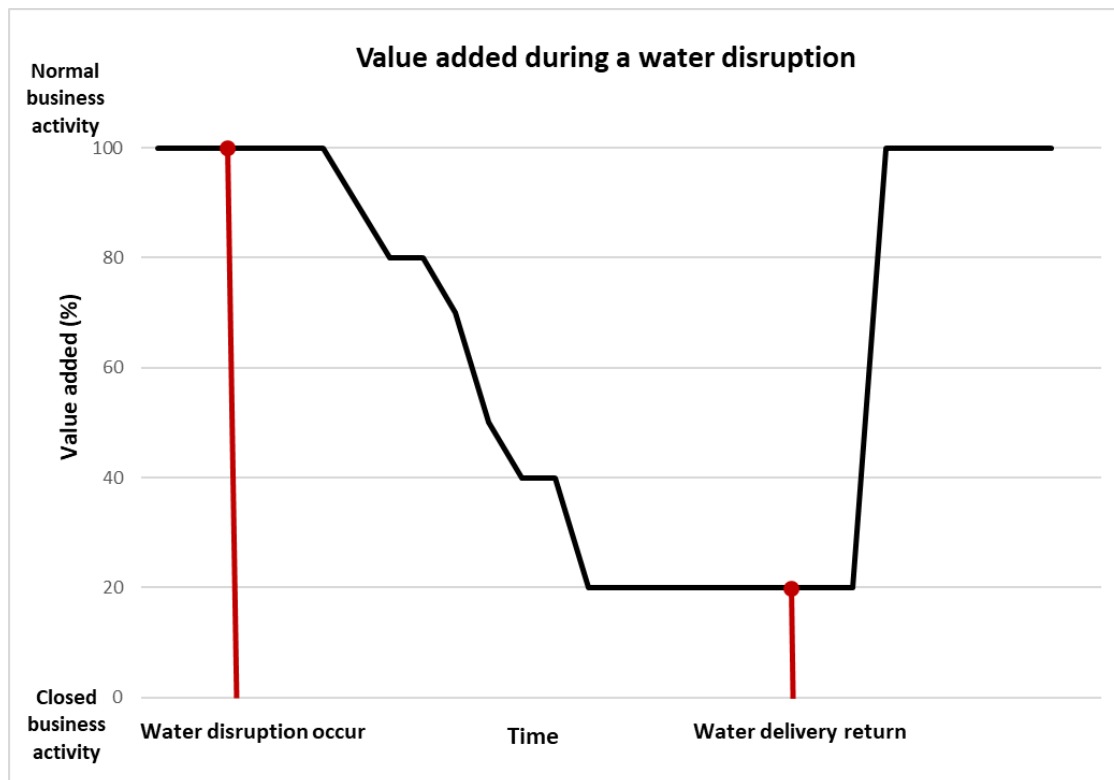

Figure 1 Example of how the value added can change during a water disruption. The company in the example can maintain normal business activity a short while after the disruption occurs. The value added then decreases gradually to 20%, a level that the company can maintain for a longer period. Shortly after the water supply has returned, the company is back in normal business activity (100 %).

**7. If you must slow down or shut down your business activity during a water disruption event, what is the reason?**

Choose one or multiple alternatives.

- ☐ The business activity is dependent on water and we can therefore not maintain normal business activity in the event of a water disruption.
- ☐ We choose to slow down or shut down our business due to the risk of not being able to handle a fire.
- ☐ We choose to slow down or shut down our business due to the risk that safety equipment, such as an emergency showers, will not work.
- ☐ We choose to slow down or shut down our business for hygienic reasons.
- ☐ Other

**8. If you need to slow down or shut down your business during a water disruption event, how long time after the water has returned is your value added back at 100%?**

100% value added corresponds to normal business activity.

For those of you who do not conduct your economic activity as a company (e.g. authorities), answer the question based on the percentage of normal activity.

|                                                       | When the water supply returns after a <u>2-hour</u> disruption, the value added is back at 100% after additionally: | When the water supply returns after a <u>4-hour</u> disruption, the value added is back at 100% after additionally: | When the supply returns after a <u>12-hour</u> disruption, the value added is back at 100% after additionally: | When the water supply returns after a <u>1-day</u> disruption, the value added is back at 100% after additionally: | When the water supply returns after a <u>1-week</u> disruption, the value added is back at 100% after additionally: | When the water supply returns after a <u>1-month</u> disruption, the value added is back at 100% after additionally: |
|-------------------------------------------------------|---------------------------------------------------------------------------------------------------------------------|---------------------------------------------------------------------------------------------------------------------|----------------------------------------------------------------------------------------------------------------|--------------------------------------------------------------------------------------------------------------------|---------------------------------------------------------------------------------------------------------------------|----------------------------------------------------------------------------------------------------------------------|
| Immediately                                           |                                                                                                                     |                                                                                                                     |                                                                                                                |                                                                                                                    |                                                                                                                     |                                                                                                                      |
| < 4 hours                                             |                                                                                                                     |                                                                                                                     |                                                                                                                |                                                                                                                    |                                                                                                                     |                                                                                                                      |
| 4-11 hours                                            |                                                                                                                     |                                                                                                                     |                                                                                                                |                                                                                                                    |                                                                                                                     |                                                                                                                      |
| 12-23 hours                                           |                                                                                                                     |                                                                                                                     |                                                                                                                |                                                                                                                    |                                                                                                                     |                                                                                                                      |
| 1-6 days                                              |                                                                                                                     |                                                                                                                     |                                                                                                                |                                                                                                                    |                                                                                                                     |                                                                                                                      |
| 1 week-1 month                                        |                                                                                                                     |                                                                                                                     |                                                                                                                |                                                                                                                    |                                                                                                                     |                                                                                                                      |
| > 1 month                                             |                                                                                                                     |                                                                                                                     |                                                                                                                |                                                                                                                    |                                                                                                                     |                                                                                                                      |
| The company cannot recover and goes bankrupt          |                                                                                                                     |                                                                                                                     |                                                                                                                |                                                                                                                    |                                                                                                                     |                                                                                                                      |
| We do not need to slow down or shut down the business |                                                                                                                     |                                                                                                                     |                                                                                                                |                                                                                                                    |                                                                                                                     |                                                                                                                      |

**9. Does your company have access to supplementary water that you can use in your business during a water disruption?**

Choose one or multiple alternatives.

- ☐ No
- ☐ Yes, groundwater
- ☐ Yes, surface water
- ☐ Yes, desalinated seawater
- ☐ Yes, we store water in a reservoir
- ☐ Yes, we can purchase water from another municipality
- ☐ Yes, we can meet our needs by purchasing water from a grocery store
- ☐ Yes, we can purchase water from another private actor
- ☐ Yes, other

**10. Have you taken any other measures to reduce the risk of being affected by a water disruption?**

Choose one or multiple alternatives.

- ☐ We plan to invest in a supplementary water source
- ☐ We plan to invest in new water efficient technology
- ☐ We have invested in new water efficient technology
- ☐ We can temporarily alter the business activity
- ☐ We have performed a risk analysis and have taken relevant precautions
- ☐ We have not currently taken or planned any measures
- ☐ Other

**11. Have your company suffered an unplanned water disruption during the last five years?**

Choose "Yes" regardless of the extent of the disruption.

- ☐ Yes
- ☐ No
- ☐ Do not know
