# Supplementary material
Source: MDPI journal article supplement (https://www.mdpi.com/2073-4441/13/11/1565)
Supplement: s1 [file s1]

## Supplementary material: Table S1

### The value of water – estimating water-disruption impacts on businesses

**Table S1.** Resiliency factors for analyzed economic activity sectors and water supply disruption durations ( $\mu$  = average, ci = half width of 90% confidence interval, P25 = 25<sup>th</sup> percentile, P75 = 75<sup>th</sup> percentile).

| NACE code | Economic activity                   | 2 h   |      |      |      | 4 h   |      |      |      | 12 h  |      |      |      | 24 h  |      |      |      | 1 week |      |      |      | 1 month |      |      |      |
|-----------|-------------------------------------|-------|------|------|------|-------|------|------|------|-------|------|------|------|-------|------|------|------|--------|------|------|------|---------|------|------|------|
|           |                                     | $\mu$ | ci   | P25  | P75  | $\mu$  | ci   | P25  | P75  | $\mu$   | ci   | P25  | P75  |
| A 01      | Crop and animal production          | 0.92  | 0.03 | 0.95 | 1.00 | 0.90  | 0.03 | 0.90 | 1.00 | 0.73  | 0.05 | 0.55 | 0.98 | 0.65  | 0.06 | 0.37 | 0.96 | 0.44   | 0.07 | 0.07 | 0.82 | 0.32    | 0.07 | 0.02 | 0.58 |
| A 02      | Forestry and logging                | 0.96  | 0.06 | 1.00 | 1.00 | 0.94  | 0.09 | 0.99 | 1.00 | 0.90  | 0.11 | 0.90 | 1.00 | 0.88  | 0.12 | 0.88 | 1.00 | 0.85   | 0.13 | 0.82 | 1.00 | 0.83    | 0.14 | 0.77 | 1.00 |
| A 03      | Fishing and aquaculture             | 0.90  | 0.16 | 1.00 | 1.00 | 0.84  | 0.24 | 0.97 | 1.00 | 0.73  | 0.28 | 0.72 | 1.00 | 0.66  | 0.30 | 0.47 | 1.00 | 0.56   | 0.34 | 0.15 | 1.00 | 0.36    | 0.21 | 0.11 | 0.62 |
| B 07-09   | Mining and quarrying                | 0.84  | 0.13 | 0.70 | 1.00 | 0.78  | 0.17 | 0.56 | 1.00 | 0.65  | 0.25 | 0.31 | 0.96 | 0.61  | 0.26 | 0.23 | 0.92 | 0.51   | 0.26 | 0.14 | 0.90 | 0.44    | 0.29 | 0.05 | 0.90 |
| C 10-12   | Food, beverage and tobacco          | 0.69  | 0.04 | 0.50 | 0.95 | 0.68  | 0.05 | 0.50 | 0.87 | 0.40  | 0.05 | 0.14 | 0.50 | 0.32  | 0.05 | 0.11 | 0.42 | 0.18   | 0.05 | 0.03 | 0.18 | 0.11    | 0.05 | 0.00 | 0.06 |
| C 13-15   | Textiles and leather                | 0.93  | 0.04 | 0.95 | 1.00 | 0.88  | 0.06 | 0.92 | 1.00 | 0.81  | 0.07 | 0.71 | 1.00 | 0.76  | 0.08 | 0.59 | 1.00 | 0.65   | 0.10 | 0.27 | 0.99 | 0.55    | 0.10 | 0.14 | 0.90 |
| C 16      | Wood products                       | 0.89  | 0.06 | 0.87 | 1.00 | 0.83  | 0.08 | 0.78 | 1.00 | 0.72  | 0.10 | 0.57 | 1.00 | 0.67  | 0.11 | 0.45 | 0.99 | 0.57   | 0.12 | 0.25 | 0.94 | 0.49    | 0.12 | 0.11 | 0.90 |
| C 17      | Paper products                      | 0.93  | 0.06 | 0.99 | 1.00 | 0.95  | 0.03 | 0.95 | 1.00 | 0.80  | 0.09 | 0.71 | 1.00 | 0.73  | 0.10 | 0.50 | 0.95 | 0.58   | 0.13 | 0.25 | 0.91 | 0.51    | 0.13 | 0.18 | 0.85 |
| C 18      | Printing and recorded media         | 0.90  | 0.10 | 0.96 | 1.00 | 0.84  | 0.15 | 0.93 | 1.00 | 0.73  | 0.18 | 0.65 | 1.00 | 0.65  | 0.20 | 0.43 | 1.00 | 0.55   | 0.24 | 0.11 | 1.00 | 0.49    | 0.24 | 0.05 | 0.97 |
| C 19      | Coke and petroleum                  | 0.75  | 0.24 | 0.50 | 1.00 | 0.78  | 0.29 | 0.71 | 1.00 | 0.62  | 0.36 | 0.36 | 0.97 | 0.58  | 0.36 | 0.31 | 0.91 | 0.47   | 0.38 | 0.13 | 0.79 | 0.44    | 0.35 | 0.14 | 0.71 |
| C 20-21   | Chemicals and pharmaceuticals       | 0.81  | 0.04 | 0.65 | 0.95 | 0.82  | 0.05 | 0.75 | 0.97 | 0.53  | 0.06 | 0.37 | 0.70 | 0.45  | 0.06 | 0.26 | 0.59 | 0.32   | 0.07 | 0.08 | 0.41 | 0.23    | 0.07 | 0.02 | 0.25 |
| C 22-23   | Rubber and plastic                  | 0.92  | 0.04 | 0.85 | 1.00 | 0.91  | 0.04 | 0.85 | 1.00 | 0.80  | 0.07 | 0.62 | 1.00 | 0.75  | 0.08 | 0.57 | 1.00 | 0.65   | 0.10 | 0.31 | 0.96 | 0.57    | 0.11 | 0.15 | 0.91 |
| C 24-25   | Metal products                      | 0.96  | 0.02 | 0.95 | 1.00 | 0.93  | 0.03 | 0.92 | 1.00 | 0.82  | 0.04 | 0.77 | 1.00 | 0.74  | 0.05 | 0.60 | 0.95 | 0.57   | 0.07 | 0.30 | 0.88 | 0.47    | 0.07 | 0.13 | 0.77 |
| C 26-27   | Computer and electronics            | 0.96  | 0.02 | 0.95 | 1.00 | 0.94  | 0.03 | 0.92 | 1.00 | 0.85  | 0.05 | 0.82 | 1.00 | 0.78  | 0.07 | 0.68 | 1.00 | 0.67   | 0.10 | 0.34 | 1.00 | 0.60    | 0.11 | 0.15 | 1.00 |
| C 28      | Machinery                           | 0.88  | 0.07 | 0.85 | 1.00 | 0.83  | 0.10 | 0.77 | 1.00 | 0.71  | 0.12 | 0.63 | 1.00 | 0.65  | 0.13 | 0.50 | 1.00 | 0.53   | 0.15 | 0.25 | 0.96 | 0.47    | 0.16 | 0.10 | 0.91 |
| C 29-30   | Transport equipment                 | 0.93  | 0.05 | 0.95 | 1.00 | 0.86  | 0.07 | 0.77 | 1.00 | 0.67  | 0.11 | 0.40 | 0.98 | 0.57  | 0.13 | 0.29 | 0.91 | 0.41   | 0.14 | 0.07 | 0.84 | 0.34    | 0.15 | 0.02 | 0.69 |
| C 31      | Furniture                           | 0.95  | 0.04 | 0.95 | 1.00 | 0.93  | 0.06 | 0.92 | 1.00 | 0.86  | 0.08 | 0.85 | 0.97 | 0.81  | 0.11 | 0.77 | 0.94 | 0.72   | 0.14 | 0.60 | 0.90 | 0.66    | 0.14 | 0.52 | 0.90 |
| C 32      | Other manufacturing                 | 0.88  | 0.06 | 0.80 | 1.00 | 0.85  | 0.07 | 0.73 | 1.00 | 0.71  | 0.09 | 0.55 | 0.97 | 0.63  | 0.10 | 0.45 | 0.93 | 0.51   | 0.11 | 0.16 | 0.82 | 0.41    | 0.12 | 0.04 | 0.73 |
| C 33      | Repair and installation             | 0.93  | 0.05 | 0.95 | 1.00 | 0.88  | 0.07 | 0.92 | 1.00 | 0.79  | 0.09 | 0.77 | 1.00 | 0.73  | 0.10 | 0.57 | 1.00 | 0.63   | 0.11 | 0.30 | 1.00 | 0.58    | 0.12 | 0.19 | 1.00 |
| D 35      | Electricity, gas, steam and air     | 0.93  | 0.04 | 0.95 | 1.00 | 0.92  | 0.03 | 0.88 | 1.00 | 0.74  | 0.08 | 0.49 | 0.99 | 0.69  | 0.09 | 0.43 | 0.96 | 0.54   | 0.11 | 0.17 | 0.90 | 0.45    | 0.12 | 0.06 | 0.88 |
| E 36-39   | Water, sewerage, waste, remediation | 0.89  | 0.06 | 0.95 | 1.00 | 0.86  | 0.07 | 0.87 | 0.99 | 0.72  | 0.09 | 0.47 | 0.96 | 0.66  | 0.10 | 0.42 | 0.93 | 0.54   | 0.11 | 0.18 | 0.88 | 0.45    | 0.12 | 0.10 | 0.84 |
| F 41-43   | Construction                        | 0.91  | 0.06 | 0.85 | 1.00 | 0.86  | 0.08 | 0.82 | 1.00 | 0.77  | 0.11 | 0.57 | 1.00 | 0.72  | 0.12 | 0.54 | 1.00 | 0.64   | 0.13 | 0.35 | 1.00 | 0.57    | 0.14 | 0.27 | 1.00 |
| G 45-47   | Wholesale and retail                | 0.89  | 0.04 | 0.90 | 1.00 | 0.83  | 0.05 | 0.80 | 0.99 | 0.71  | 0.06 | 0.61 | 0.91 | 0.63  | 0.07 | 0.40 | 0.91 | 0.48   | 0.09 | 0.13 | 0.85 | 0.38    | 0.09 | 0.04 | 0.67 |
| H 49-53   | Transportation and storage          | 0.95  | 0.02 | 0.95 | 1.00 | 0.91  | 0.04 | 0.92 | 1.00 | 0.81  | 0.06 | 0.72 | 1.00 | 0.73  | 0.07 | 0.59 | 1.00 | 0.59   | 0.08 | 0.24 | 0.96 | 0.51    | 0.09 | 0.11 | 0.91 |
| I 55-56   | Accommodation and food service      | 0.70  | 0.04 | 0.55 | 0.85 | 0.62  | 0.05 | 0.49 | 0.82 | 0.36  | 0.05 | 0.16 | 0.51 | 0.29  | 0.05 | 0.12 | 0.41 | 0.17   | 0.05 | 0.02 | 0.19 | 0.10    | 0.04 | 0.00 | 0.19 |
| J 58-63   | Information and communication       | 0.97  | 0.02 | 1.00 | 1.00 | 0.94  | 0.02 | 0.93 | 1.00 | 0.86  | 0.04 | 0.80 | 1.00 | 0.80  | 0.05 | 0.67 | 1.00 | 0.71   | 0.06 | 0.51 | 1.00 | 0.66    | 0.06 | 0.37 | 1.00 |
| K 64-66   | Financial and insurance activities  | 0.96  | 0.02 | 0.95 | 1.00 | 0.92  | 0.04 | 0.91 | 1.00 | 0.76  | 0.08 | 0.60 | 1.00 | 0.66  | 0.10 | 0.41 | 0.97 | 0.52   | 0.13 | 0.11 | 0.90 | 0.42    | 0.13 | 0.03 | 0.90 |
| L 68      | Real estate activities              | 0.87  | 0.04 | 0.85 | 0.99 | 0.78  | 0.06 | 0.72 | 0.94 | 0.59  | 0.07 | 0.46 | 0.83 | 0.50  | 0.07 | 0.34 | 0.73 | 0.33   | 0.08 | 0.10 | 0.51 | 0.26    | 0.08 | 0.03 | 0.38 |

| NACE<br>code | Economic activity                   | 2 h  |      |      |      | 4 h  |      |      |      | 12 h |      |      |      | 24 h |      |      |      | 1 week |      |      |      | 1 month |      |      |      |
|--------------|-------------------------------------|------|------|------|------|------|------|------|------|------|------|------|------|------|------|------|------|--------|------|------|------|---------|------|------|------|
|              |                                     | μ    | ci   | P25  | P75  | μ      | ci   | P25  | P75  | μ       | ci   | P25  | P75  |
| M 69-75      | Scientific and technical activities | 0.91 | 0.03 | 0.95 | 1.00 | 0.86 | 0.04 | 0.82 | 1.00 | 0.74 | 0.05 | 0.52 | 1.00 | 0.67 | 0.06 | 0.40 | 0.97 | 0.56   | 0.07 | 0.11 | 0.90 | 0.48    | 0.07 | 0.04 | 0.90 |
| N 77-82      | Administrative and support services | 0.89 | 0.05 | 0.87 | 1.00 | 0.83 | 0.07 | 0.75 | 1.00 | 0.72 | 0.09 | 0.49 | 0.99 | 0.66 | 0.10 | 0.42 | 0.95 | 0.55   | 0.11 | 0.11 | 0.90 | 0.50    | 0.12 | 0.04 | 0.90 |
| O 84         | Public administration and defense   | 0.91 | 0.03 | 0.85 | 1.00 | 0.86 | 0.04 | 0.80 | 0.97 | 0.71 | 0.06 | 0.53 | 0.91 | 0.64 | 0.07 | 0.41 | 0.90 | 0.51   | 0.09 | 0.25 | 0.83 | 0.44    | 0.09 | 0.14 | 0.73 |
| P 85         | Education                           | 0.90 | 0.03 | 0.85 | 1.00 | 0.84 | 0.05 | 0.73 | 1.00 | 0.66 | 0.08 | 0.36 | 0.96 | 0.56 | 0.09 | 0.25 | 0.92 | 0.41   | 0.11 | 0.06 | 0.90 | 0.37    | 0.11 | 0.02 | 0.87 |
| Q 86-88      | Human health and social work        | 0.79 | 0.03 | 0.55 | 0.99 | 0.71 | 0.05 | 0.51 | 0.94 | 0.53 | 0.06 | 0.25 | 0.87 | 0.45 | 0.06 | 0.16 | 0.78 | 0.35   | 0.06 | 0.03 | 0.63 | 0.28    | 0.06 | 0.01 | 0.41 |
| R 90-93      | Arts. entertainment and recreation  | 0.82 | 0.04 | 0.65 | 1.00 | 0.77 | 0.05 | 0.58 | 1.00 | 0.58 | 0.06 | 0.27 | 0.95 | 0.51 | 0.06 | 0.19 | 0.87 | 0.38   | 0.07 | 0.05 | 0.69 | 0.31    | 0.06 | 0.02 | 0.41 |
| S 94-96      | Other service activities            | 0.84 | 0.03 | 0.65 | 1.00 | 0.78 | 0.04 | 0.62 | 1.00 | 0.62 | 0.05 | 0.40 | 0.87 | 0.54 | 0.05 | 0.27 | 0.86 | 0.40   | 0.06 | 0.06 | 0.71 | 0.33    | 0.06 | 0.01 | 0.62 |
