# Supplementary material
Source: MDPI journal article supplement (https://www.mdpi.com/2073-4441/13/11/1565)
Supplement: s1 [file s1]

## Supplementary material: Table S2

### The value of water – estimating water-disruption impacts on businesses

**Table S2.** Mean, 25<sup>th</sup> percentile and 75<sup>th</sup> percentile values of the resiliency factors, along with their respective bootstrapped standard errors (10,000 iterations).

| NACE    | Variable | 2 h           | 4 h            | 12 h          | 24 h          | 1 w            | 1 m             |
|---------|----------|---------------|----------------|---------------|---------------|----------------|-----------------|
| A 01    | Mean     | 0.92 ± 0.017  | 0.90 ± 0.020   | 0.73 ± 0.033  | 0.65 ± 0.038  | 0.44 ± 0.044   | 0.32 ± 0.044    |
|         | P25      | 0.95 ± 0.050  | 0.90 ± 0.043   | 0.55 ± 0.055  | 0.37 ± 0.096  | 0.07 ± 0.036   | 0.023 ± 0.011   |
|         | P75      | 1.00 ± 0      | 1.00 ± 0.00051 | 0.98 ± 0.025  | 0.96 ± 0.048  | 0.82 ± 0.13    | 0.58 ± 0.14     |
| A 02    | Mean     | 0.96 ± 0.033  | 0.94 ± 0.051   | 0.90 ± 0.066  | 0.88 ± 0.070  | 0.85 ± 0.075   | 0.83 ± 0.080    |
|         | P25      | 1.00 ± 0.056  | 0.99 ± 0.085   | 0.90 ± 0.11   | 0.88 ± 0.12   | 0.82 ± 0.15    | 0.77 ± 0.19     |
|         | P75      | 1.00 ± 0      | 1.00 ± 0.00031 | 1.00 ± 0.0041 | 1.00 ± 0.0081 | 1.00 ± 0.0084  | 1.00 ± 0.011    |
| A 03    | Mean     | 0.90 ± 0.090  | 0.84 ± 0.13    | 0.73 ± 0.15   | 0.66 ± 0.16   | 0.56 ± 0.19    | 0.36 ± 0.12     |
|         | P25      | 1.00 ± 0.22   | 0.97 ± 0.32    | 0.72 ± 0.33   | 0.47 ± 0.31   | 0.15 ± 0.32    | 0.11 ± 0.21     |
|         | P75      | 1.00 ± 0.041  | 1.00 ± 0.066   | 1.00 ± 0.11   | 1.00 ± 0.17   | 1.00 ± 0.27    | 0.62 ± 0.15     |
| B 07–09 | Mean     | 0.84 ± 0.073  | 0.78 ± 0.093   | 0.65 ± 0.14   | 0.61 ± 0.15   | 0.51 ± 0.15    | 0.44 ± 0.16     |
|         | P25      | 0.70 ± 0.14   | 0.56 ± 0.18    | 0.31 ± 0.27   | 0.23 ± 0.28   | 0.14 ± 0.21    | 0.045 ± 0.20    |
|         | P75      | 1.00 ± 0.060  | 1.00 ± 0.086   | 0.96 ± 0.12   | 0.92 ± 0.14   | 0.90 ± 0.21    | 0.90 ± 0.28     |
| C 10-12 | Mean     | 0.69 ± 0.025  | 0.68 ± 0.031   | 0.40 ± 0.032  | 0.32 ± 0.032  | 0.18 ± 0.030   | 0.11 ± 0.029    |
|         | P25      | 0.50 ± 0.0051 | 0.50 ± 0.078   | 0.14 ± 0.050  | 0.11 ± 0.042  | 0.028 ± 0.0091 | 0.0028 ± 0.0030 |
|         | P75      | 0.95 ± 0.051  | 0.87 ± 0.030   | 0.50 ± 0.051  | 0.42 ± 0.034  | 0.18 ± 0.067   | 0.057 ± 0.043   |
| C 13-15 | Mean     | 0.93 ± 0.025  | 0.88 ± 0.038   | 0.81 ± 0.042  | 0.76 ± 0.047  | 0.65 ± 0.057   | 0.55 ± 0.061    |
|         | P25      | 0.95 ± 0.061  | 0.92 ± 0.098   | 0.71 ± 0.085  | 0.59 ± 0.092  | 0.27 ± 0.13    | 0.14 ± 0.11     |
|         | P75      | 1.00 ± 0      | 1.00 ± 0       | 1.00 ± 0.0050 | 1.00 ± 0.012  | 0.99 ± 0.036   | 0.90 ± 0.079    |
| C 16    | Mean     | 0.89 ± 0.033  | 0.83 ± 0.049   | 0.72 ± 0.062  | 0.67 ± 0.066  | 0.57 ± 0.072   | 0.49 ± 0.073    |
|         | P25      | 0.87 ± 0.12   | 0.78 ± 0.15    | 0.57 ± 0.17   | 0.45 ± 0.16   | 0.25 ± 0.12    | 0.11 ± 0.10     |
|         | P75      | 1.00 ± 0.0035 | 1.00 ± 0.0097  | 1.00 ± 0.029  | 0.99 ± 0.046  | 0.94 ± 0.074   | 0.90 ± 0.12     |
| C 17    | Mean     | 0.93 ± 0.033  | 0.95 ± 0.018   | 0.80 ± 0.054  | 0.73 ± 0.062  | 0.58 ± 0.079   | 0.51 ± 0.079    |
|         | P25      | 0.99 ± 0.080  | 0.95 ± 0.040   | 0.71 ± 0.14   | 0.50 ± 0.15   | 0.25 ± 0.16    | 0.18 ± 0.11     |
|         | P75      | 1.00 ± 0      | 1.00 ± 0.0033  | 1.00 ± 0.022  | 0.95 ± 0.041  | 0.91 ± 0.078   | 0.85 ± 0.098    |
| C 18    | Mean     | 0.90 ± 0.060  | 0.84 ± 0.089   | 0.73 ± 0.10   | 0.65 ± 0.11   | 0.55 ± 0.14    | 0.49 ± 0.14     |
|         | P25      | 0.96 ± 0.18   | 0.93 ± 0.26    | 0.65 ± 0.25   | 0.43 ± 0.21   | 0.11 ± 0.20    | 0.049 ± 0.17    |
|         | P75      | 1.00 ± 0.0063 | 1.00 ± 0.0089  | 1.00 ± 0.063  | 1.00 ± 0.12   | 1.00 ± 0.19    | 0.97 ± 0.22     |
| C 19    | Mean     | 0.75 ± 0.13   | 0.78 ± 0.15    | 0.62 ± 0.19   | 0.58 ± 0.19   | 0.47 ± 0.20    | 0.44 ± 0.18     |
|         | P25      | 0.50 ± 0.19   | 0.71 ± 0.27    | 0.36 ± 0.29   | 0.31 ± 0.28   | 0.13 ± 0.26    | 0.14 ± 0.23     |
|         | P75      | 1.00 ± 0.19   | 1.00 ± 0.13    | 0.97 ± 0.23   | 0.91 ± 0.23   | 0.79 ± 0.29    | 0.71 ± 0.26     |
| C 20-21 | Mean     | 0.81 ± 0.025  | 0.82 ± 0.028   | 0.53 ± 0.034  | 0.45 ± 0.036  | 0.32 ± 0.040   | 0.23 ± 0.042    |
|         | P25      | 0.65 ± 0.083  | 0.75 ± 0.071   | 0.37 ± 0.052  | 0.26 ± 0.041  | 0.081 ± 0.050  | 0.020 ± 0.014   |
|         | P75      | 0.95 ± 0.026  | 0.97 ± 0.025   | 0.70 ± 0.050  | 0.59 ± 0.059  | 0.41 ± 0.061   | 0.25 ± 0.076    |
| C 22-23 | Mean     | 0.92 ± 0.022  | 0.91 ± 0.023   | 0.80 ± 0.041  | 0.75 ± 0.048  | 0.65 ± 0.059   | 0.57 ± 0.064    |
|         | P25      | 0.85 ± 0.095  | 0.85 ± 0.060   | 0.62 ± 0.12   | 0.57 ± 0.14   | 0.31 ± 0.15    | 0.15 ± 0.15     |
|         | P75      | 1.00 ± 0      | 1.00 ± 0.00059 | 1.00 ± 0.017  | 1.00 ± 0.033  | 0.96 ± 0.041   | 0.91 ± 0.063    |
| C 24-25 | Mean     | 0.96 ± 0.010  | 0.93 ± 0.016   | 0.82 ± 0.027  | 0.74 ± 0.032  | 0.57 ± 0.041   | 0.47 ± 0.043    |
|         | P25      | 0.95 ± 0.018  | 0.92 ± 0.020   | 0.77 ± 0.032  | 0.60 ± 0.049  | 0.30 ± 0.082   | 0.13 ± 0.070    |
|         | P75      | 1.00 ± 0      | 1.00 ± 0.00049 | 1.00 ± 0.017  | 0.95 ± 0.031  | 0.88 ± 0.059   | 0.77 ± 0.091    |
| C 26-27 | Mean     | 0.96 ± 0.012  | 0.94 ± 0.017   | 0.85 ± 0.032  | 0.78 ± 0.044  | 0.67 ± 0.059   | 0.60 ± 0.063    |
|         | P25      | 0.95 ± 0.035  | 0.92 ± 0.031   | 0.82 ± 0.11   | 0.68 ± 0.16   | 0.34 ± 0.21    | 0.15 ± 0.15     |
|         | P75      | 1.00 ± 0      | 1.00 ± 0.00011 | 1.00 ± 0.0090 | 1.00 ± 0.016  | 1.00 ± 0.040   | 1.00 ± 0.048    |
| C 28    | Mean     | 0.88 ± 0.041  | 0.83 ± 0.058   | 0.71 ± 0.071  | 0.65 ± 0.076  | 0.53 ± 0.089   | 0.47 ± 0.093    |
|         | P25      | 0.85 ± 0.13   | 0.77 ± 0.16    | 0.63 ± 0.15   | 0.50 ± 0.14   | 0.25 ± 0.13    | 0.10 ± 0.10     |
|         | P75      | 1.00 ± 0.016  | 1.00 ± 0.019   | 1.00 ± 0.083  | 1.00 ± 0.12   | 0.96 ± 0.19    | 0.91 ± 0.21     |
| C 29-30 | Mean     | 0.93 ± 0.028  | 0.86 ± 0.040   | 0.67 ± 0.066  | 0.57 ± 0.076  | 0.41 ± 0.084   | 0.34 ± 0.088    |
|         | P25      | 0.95 ± 0.067  | 0.77 ± 0.081   | 0.40 ± 0.12   | 0.29 ± 0.090  | 0.07 ± 0.065   | 0.02 ± 0.033    |
|         | P75      | 1.00 ± 0.0025 | 1.00 ± 0.023   | 0.98 ± 0.089  | 0.91 ± 0.12   | 0.84 ± 0.19    | 0.69 ± 0.25     |
| C 31    | Mean     | 0.95 ± 0.022  | 0.93 ± 0.032   | 0.86 ± 0.048  | 0.81 ± 0.063  | 0.72 ± 0.081   | 0.66 ± 0.084    |
|         | P25      | 0.95 ± 0.048  | 0.92 ± 0.068   | 0.85 ± 0.093  | 0.77 ± 0.14   | 0.60 ± 0.19    | 0.52 ± 0.18     |
|         | P75      | 1.00 ± 0.0063 | 1.00 ± 0.011   | 0.97 ± 0.035  | 0.94 ± 0.034  | 0.90 ± 0.033   | 0.90 ± 0.061    |
| C32     | Mean     | 0.88 ± 0.033  | 0.85 ± 0.041   | 0.71 ± 0.055  | 0.63 ± 0.060  | 0.51 ± 0.065   | 0.41 ± 0.069    |
|         | P25      | 0.80 ± 0.099  | 0.73 ± 0.10    | 0.55 ± 0.11   | 0.45 ± 0.11   | 0.16 ± 0.12    | 0.04 ± 0.064    |
|         | P75      | 1.00 ± 0.0022 | 1.00 ± 0.0054  | 0.97 ± 0.048  | 0.93 ± 0.074  | 0.82 ± 0.091   | 0.73 ± 0.11     |
| C 33    | Mean     | 0.93 ± 0.028  | 0.88 ± 0.041   | 0.79 ± 0.053  | 0.73 ± 0.059  | 0.63 ± 0.068   | 0.58 ± 0.075    |
|         | P25      | 0.95 ± 0.073  | 0.92 ± 0.12    | 0.77 ± 0.16   | 0.57 ± 0.16   | 0.30 ± 0.13    | 0.19 ± 0.12     |
|         | P75      | 1.00 ± 0      | 1.00 ± 0.0023  | 1.00 ± 0.017  | 1.00 ± 0.026  | 1.00 ± 0.050   | 1.00 ± 0.066    |

| NACE    | Variable | 2 h            | 4 h            | 12 h         | 24 h         | 1 w           | 1 m             |
|---------|----------|----------------|----------------|--------------|--------------|---------------|-----------------|
| D 35    | Mean     | 0.93 ± 0.024   | 0.92 ± 0.018   | 0.74 ± 0.045 | 0.69 ± 0.052 | 0.54 ± 0.066  | 0.45 ± 0.069    |
|         | P25      | 0.95 ± 0.048   | 0.88 ± 0.029   | 0.49 ± 0.045 | 0.43 ± 0.061 | 0.17 ± 0.12   | 0.06 ± 0.076    |
|         | P75      | 1.00 ± 0.00057 | 1.00 ± 0.010   | 0.99 ± 0.031 | 0.96 ± 0.035 | 0.90 ± 0.067  | 0.88 ± 0.11     |
| E 36-39 | Mean     | 0.89 ± 0.034   | 0.86 ± 0.041   | 0.72 ± 0.056 | 0.66 ± 0.061 | 0.54 ± 0.067  | 0.45 ± 0.070    |
|         | P25      | 0.95 ± 0.13    | 0.87 ± 0.13    | 0.47 ± 0.13  | 0.42 ± 0.12  | 0.18 ± 0.13   | 0.10 ± 0.076    |
|         | P75      | 1.00 ± 0.0060  | 0.99 ± 0.013   | 0.96 ± 0.036 | 0.93 ± 0.048 | 0.88 ± 0.091  | 0.84 ± 0.12     |
| F 41-43 | Mean     | 0.91 ± 0.034   | 0.86 ± 0.049   | 0.77 ± 0.063 | 0.72 ± 0.069 | 0.64 ± 0.075  | 0.57 ± 0.084    |
|         | P25      | 0.85 ± 0.087   | 0.82 ± 0.12    | 0.57 ± 0.12  | 0.54 ± 0.14  | 0.35 ± 0.12   | 0.27 ± 0.12     |
|         | P75      | 1.00 ± 0.0023  | 1.00 ± 0.0057  | 1.00 ± 0.022 | 1.00 ± 0.037 | 1.00 ± 0.074  | 1.00 ± 0.11     |
| G 45-47 | Mean     | 0.89 ± 0.023   | 0.83 ± 0.031   | 0.71 ± 0.039 | 0.63 ± 0.045 | 0.48 ± 0.053  | 0.38 ± 0.054    |
|         | P25      | 0.90 ± 0.090   | 0.80 ± 0.098   | 0.61 ± 0.063 | 0.40 ± 0.074 | 0.13 ± 0.062  | 0.04 ± 0.038    |
|         | P75      | 1.00 ± 0.018   | 0.99 ± 0.024   | 0.91 ± 0.043 | 0.91 ± 0.054 | 0.85 ± 0.092  | 0.67 ± 0.16     |
| H 49-53 | Mean     | 0.95 ± 0.014   | 0.91 ± 0.022   | 0.81 ± 0.033 | 0.73 ± 0.041 | 0.59 ± 0.051  | 0.51 ± 0.053    |
|         | P25      | 0.95 ± 0.044   | 0.92 ± 0.038   | 0.72 ± 0.067 | 0.59 ± 0.091 | 0.24 ± 0.15   | 0.11 ± 0.11     |
|         | P75      | 1.00 ± 0       | 1.00 ± 0.00044 | 1.00 ± 0.016 | 1.00 ± 0.027 | 0.96 ± 0.062  | 0.91 ± 0.092    |
| I 55-56 | Mean     | 0.70 ± 0.024   | 0.62 ± 0.030   | 0.36 ± 0.028 | 0.29 ± 0.028 | 0.17 ± 0.028  | 0.10 ± 0.023    |
|         | P25      | 0.55 ± 0.023   | 0.49 ± 0.079   | 0.16 ± 0.044 | 0.12 ± 0.024 | 0.02 ± 0.0098 | 0.0014 ± 0.0017 |
|         | P75      | 0.85 ± 0.052   | 0.82 ± 0.052   | 0.51 ± 0.039 | 0.41 ± 0.021 | 0.19 ± 0.052  | 0.19 ± 0.057    |
| J 58-63 | Mean     | 0.97 ± 0.0094  | 0.94 ± 0.013   | 0.86 ± 0.022 | 0.80 ± 0.028 | 0.71 ± 0.035  | 0.66 ± 0.038    |
|         | P25      | 1.00 ± 0.019   | 0.93 ± 0.025   | 0.80 ± 0.048 | 0.67 ± 0.064 | 0.51 ± 0.11   | 0.37 ± 0.10     |
|         | P75      | 1.00 ± 0       | 1.00 ± 0       | 1.00 ± 0     | 1.00 ± 0     | 1.00 ± 0.0028 | 1.00 ± 0.010    |
| K 64-66 | Mean     | 0.96 ± 0.015   | 0.92 ± 0.023   | 0.76 ± 0.047 | 0.66 ± 0.061 | 0.52 ± 0.077  | 0.42 ± 0.078    |
|         | P25      | 0.95 ± 0.021   | 0.91 ± 0.038   | 0.60 ± 0.068 | 0.41 ± 0.090 | 0.11 ± 0.11   | 0.029 ± 0.086   |
|         | P75      | 1.00 ± 0.0029  | 1.00 ± 0.011   | 1.00 ± 0.038 | 0.97 ± 0.058 | 0.90 ± 0.11   | 0.90 ± 0.18     |
| L 68    | Mean     | 0.87 ± 0.025   | 0.78 ± 0.037   | 0.59 ± 0.043 | 0.50 ± 0.045 | 0.33 ± 0.048  | 0.26 ± 0.047    |
|         | P25      | 0.85 ± 0.075   | 0.72 ± 0.12    | 0.46 ± 0.090 | 0.34 ± 0.070 | 0.10 ± 0.040  | 0.028 ± 0.028   |
|         | P75      | 0.99 ± 0.025   | 0.94 ± 0.019   | 0.83 ± 0.052 | 0.73 ± 0.082 | 0.51 ± 0.098  | 0.38 ± 0.12     |
| M 69-75 | Mean     | 0.91 ± 0.017   | 0.86 ± 0.024   | 0.74 ± 0.032 | 0.67 ± 0.036 | 0.56 ± 0.043  | 0.48 ± 0.044    |
|         | P25      | 0.95 ± 0.069   | 0.82 ± 0.076   | 0.52 ± 0.069 | 0.40 ± 0.077 | 0.11 ± 0.062  | 0.036 ± 0.040   |
|         | P75      | 1.00 ± 0       | 1.00 ± 0.00031 | 1.00 ± 0.019 | 0.97 ± 0.030 | 0.90 ± 0.042  | 0.90 ± 0.053    |
| N 77-82 | Mean     | 0.89 ± 0.029   | 0.83 ± 0.043   | 0.72 ± 0.054 | 0.66 ± 0.059 | 0.55 ± 0.068  | 0.50 ± 0.069    |
|         | P25      | 0.87 ± 0.11    | 0.75 ± 0.14    | 0.49 ± 0.15  | 0.42 ± 0.16  | 0.11 ± 0.13   | 0.040 ± 0.095   |
|         | P75      | 1.00 ± 0.00053 | 1.00 ± 0.0061  | 0.99 ± 0.031 | 0.95 ± 0.038 | 0.90 ± 0.034  | 0.90 ± 0.058    |
| O 84    | Mean     | 0.91 ± 0.019   | 0.86 ± 0.026   | 0.71 ± 0.037 | 0.64 ± 0.044 | 0.51 ± 0.051  | 0.44 ± 0.051    |
|         | P25      | 0.85 ± 0.062   | 0.80 ± 0.074   | 0.53 ± 0.042 | 0.41 ± 0.043 | 0.25 ± 0.058  | 0.14 ± 0.075    |
|         | P75      | 1.00 ± 0.0078  | 0.97 ± 0.022   | 0.91 ± 0.025 | 0.90 ± 0.034 | 0.83 ± 0.093  | 0.73 ± 0.13     |
| P 85    | Mean     | 0.90 ± 0.021   | 0.84 ± 0.029   | 0.66 ± 0.047 | 0.56 ± 0.054 | 0.41 ± 0.066  | 0.37 ± 0.068    |
|         | P25      | 0.85 ± 0.046   | 0.73 ± 0.064   | 0.36 ± 0.064 | 0.25 ± 0.054 | 0.057 ± 0.019 | 0.020 ± 0.0092  |
|         | P75      | 1.00 ± 0.0093  | 1.00 ± 0.016   | 0.96 ± 0.052 | 0.92 ± 0.082 | 0.90 ± 0.16   | 0.87 ± 0.17     |
| Q 86-88 | Mean     | 0.79 ± 0.021   | 0.71 ± 0.029   | 0.53 ± 0.035 | 0.45 ± 0.037 | 0.35 ± 0.039  | 0.28 ± 0.038    |
|         | P25      | 0.55 ± 0.052   | 0.51 ± 0.076   | 0.25 ± 0.042 | 0.16 ± 0.032 | 0.032 ± 0.014 | 0.0098 ± 0.0061 |
|         | P75      | 0.99 ± 0.025   | 0.94 ± 0.026   | 0.87 ± 0.071 | 0.78 ± 0.10  | 0.63 ± 0.15   | 0.41 ± 0.15     |
| R 90-93 | Mean     | 0.82 ± 0.021   | 0.77 ± 0.027   | 0.58 ± 0.036 | 0.51 ± 0.038 | 0.38 ± 0.040  | 0.31 ± 0.039    |
|         | P25      | 0.65 ± 0.066   | 0.58 ± 0.075   | 0.27 ± 0.053 | 0.19 ± 0.038 | 0.049 ± 0.020 | 0.016 ± 0.018   |
|         | P75      | 1.00 ± 0.0081  | 1.00 ± 0.012   | 0.95 ± 0.074 | 0.87 ± 0.10  | 0.69 ± 0.14   | 0.41 ± 0.18     |
| S 94-96 | Mean     | 0.84 ± 0.018   | 0.78 ± 0.023   | 0.62 ± 0.030 | 0.54 ± 0.032 | 0.40 ± 0.035  | 0.33 ± 0.036    |
|         | P25      | 0.65 ± 0.058   | 0.62 ± 0.062   | 0.40 ± 0.066 | 0.27 ± 0.050 | 0.056 ± 0.024 | 0.012 ± 0.013   |
|         | P75      | 1.00 ± 0.0022  | 1.00 ± 0.012   | 0.87 ± 0.059 | 0.86 ± 0.075 | 0.71 ± 0.13   | 0.62 ± 0.16     |
